# Supplementary material for: Genetic Heterogeneity in Latent Autoimmune Diabetes Is Linked to Various Degrees of Autoimmune Activity: Results From the Nord-Trøndelag Health Study
Source: PubMed Central journal article supplement — Diabetes. 2009 Oct 15;59(1):302–10. doi: 10.2337/db09-0923 (PMC2797937; doi:10.2337/db09-0923), 2009-10-15
Supplement: supp_db09-0923_db0923_Online_appendix_Tables_1-8-11.pdf [file supp_db09-0923_db0923_Online_appendix_Tables_1-8-11.pdf]

## SUPPLEMENTARY DATA – Online Appendix Tables 1, 8, 11

**Supplementary table 1:** Genotyped tagSNPs from known risk or protective HLA alleles for type 1 diabetes selected from supplementary table 3 in deBakker *et al.* (28)

| HLA allele   | Frequency | Tag SNPs                      |
|--------------|-----------|-------------------------------|
| HLA-DQA*0101 | 0.1333    | rs8457614,rs1794285           |
| HLA-DQA*0102 | 0.2389    | rs14004,rs8457594             |
| HLA-DQA*0201 | 0.1333    | rs7745002,rs2858333,rs6p0315  |
| HLA-DQA*0301 | 0.2278    | rs3129883,rs7745002,rs3844313 |
| HLA-DQA*0401 | 0.0333    | rs7743506                     |
| HLA-DQA*0501 | 0.1778    | rs10485326,rs2040406          |
| HLA-DQB*0201 | 0.1556    | rs4988889                     |
| HLA-DQB*0301 | 0.1667    | rs7744001,rs2856691           |
| HLA-DQB*0302 | 0.1444    | rs7454108,rs2071876           |
| HLA-DQB*0303 | 0.0611    | rs3834857,rs2395533           |
| HLA-DQB*0402 | 0.0333    | rs7743506                     |
| HLA-DQB*0501 | 0.0944    | rs8457614                     |
| HLA-DQB*0503 | 0.0389    | rs1794285                     |
| HLA-DQB*0602 | 0.2000    | rs3135388                     |
| HLA-DRB*0101 | 0.0889    | rs4947332,rs8457614           |
| HLA-DRB*0301 | 0.0944    | rs2040410                     |
| HLA-DRB*0401 | 0.0889    | rs8910071,rs3817964,rs860895  |
| HLA-DRB*0402 | 0.0056    | rs3130071,rs416352            |
| HLA-DRB*0403 | 0.0167    | rs7454108,rs206765,rs399604   |
| HLA-DRB*0405 | 0.0056    | rs1057149                     |
| HLA-DRB*0701 | 0.1000    | rs7745002,rs2647087,rs241398  |
| HLA-DRB*0801 | 0.0333    | rs7743506                     |
| HLA-DRB*0901 |           | Not reported                  |
| HLA-DRB*1101 | 0.0500    | rs434841,rs1061172,rs5875439  |
| HLA-DRB*1401 | 0.0333    | rs2763979,rs1794285           |
| HLA-DRB*1404 | 0.0056    | rs805262,rs1794285            |
| HLA-DRB*1501 | 0.2000    | rs3135388                     |

**Supplementary table 8:** Successfully genotyped tag SNPs used for phasing HLA-haplotypes

| HLA-haplotypes                    | Tag SNPs                                         |
|-----------------------------------|--------------------------------------------------|
| DRB1*0402 - DQA1*0301 - DQB1*0302 | rs3130071 rs416352 rs3129883 rs7454108 rs2071876 |
| DRB1*0401 - DQA1*0301 - DQB1*0302 | rs8910071 rs3129883 rs7454108 rs2071876          |
| DRB1*0901 - DQA1*0301 - DQB1*0303 | rs3129883 rs2395533                              |
| DRB1*1501 - DQA1*0102 - DQB1*0602 | rs14004 rs3135388                                |
| DRB1*0701 - DQA1*0201 - DQB1*0303 | rs2858333 rs241398 rs2395533                     |
| DRB1*0401 - DQA1*0301 - DQB1*0301 | rs8910071 rs3129883 rs7744001                    |
| DRB1*0403 - DQA1*0301 - DQB1*0302 | rs3129883 rs7454108 rs2071876 rs206765 rs399604  |

**Supplementary table 11:** Phenotypic characteristics for the less stringent classified diabetic cases divided in male and female subjects. Data are listed as means  $\pm$  SD.

|                                 | LADA            |                 | Type 1 diabetes |                 | Type 2 diabetes |                 |
|---------------------------------|-----------------|-----------------|-----------------|-----------------|-----------------|-----------------|
|                                 | Male            | Female          | Male            | Female          | Male            | Female          |
| N                               | 8               | 10              | 12              | 4               | 103             | 152             |
| Age when attended (years)       | 67 $\pm$ 13     | 71 $\pm$ 9      | 41 $\pm$ 16     | 45 $\pm$ 14     | 67 $\pm$ 12     | 73 $\pm$ 11     |
| Age at diagnosis (years)        | 55 $\pm$ 13     | 61 $\pm$ 10     | 21 $\pm$ 9      | 21 $\pm$ 5      | 59 $\pm$ 12     | 63 $\pm$ 13     |
| BMI (kg/m <sup>2</sup> )        | 26.7 $\pm$ 3.4  | 26.3 $\pm$ 5.32 | 26.9 $\pm$ 2.6  | 25.3 $\pm$ 2.3  | 28.4 $\pm$ 4.5  | 29.8 $\pm$ 5.2  |
| Waist-to-hip ratio              | 0.92 $\pm$ 0.06 | 0.84 $\pm$ 0.09 | 0.88 $\pm$ 0.04 | 0.76 $\pm$ 0.16 | 0.94 $\pm$ 0.06 | 0.86 $\pm$ 0.07 |
| Cholesterol (mmol/l)            | 5.8 $\pm$ 1.0   | 6.4 $\pm$ 0.9   | 5.4 $\pm$ 1.4   | 5.9 $\pm$ 1.1   | 5.9 $\pm$ 1.2   | 6.7 $\pm$ 1.4   |
| HDL (mmol/l)                    | 1.5 $\pm$ 0.6   | 1.6 $\pm$ 0.6   | 1.4 $\pm$ 0.5   | 1.9 $\pm$ 0.3   | 1.2 $\pm$ 0.4   | 1.3 $\pm$ 0.4   |
| Triglycerides (mmol/l)          | 1.1 $\pm$ 0.6   | 1.8 $\pm$ 1.3   | 1.6 $\pm$ 0.84  | 1.3 $\pm$ 0.73  | 2.3 $\pm$ 1.4   | 2.6 $\pm$ 2.4   |
| Systolic blood pressure (mmHg)  | 150 $\pm$ 17    | 147 $\pm$ 25    | 134 $\pm$ 12    | 126 $\pm$ 14    | 154 $\pm$ 24    | 162 $\pm$ 24    |
| Diastolic blood pressure (mmHg) | 83 $\pm$ 7.5    | 83 $\pm$ 13     | 78 $\pm$ 12     | 72 $\pm$ 6.5    | 86 $\pm$ 13     | 87 $\pm$ 14     |
| Non-fasting Glucose (mmol/l)    | 9.3 $\pm$ 5.8   | 11.2 $\pm$ 6.1  | 9.8 $\pm$ 4.5   | 8.0 $\pm$ 5.0   | 10.8 $\pm$ 4.9  | 9.3 $\pm$ 4.3   |
